# Supplementary material for: Oxytocin and arginine vasopressin receptor evolution: implications for adaptive novelties in placental mammals
Source: PubMed Central journal article supplement (PMC5127151; doi:10.1590/1678-4685-gmb-2015-0323), 2016-08-08
Supplement: 1415-4757-gmb-1678-4685-GMB-2015-0323-Suppl01.pdf [file 1415-4757-gmb-1678-4685-GMB-2015-0323-Suppl01.pdf]

**Table S1**

Species included in the molecular evolution, protein disorder content, and SLiM prediction analyses.

| COMMON NAME            | SPECIES                                | CHROMOSOME LOCATION                          |                                              |                                               |                                              |
|------------------------|----------------------------------------|----------------------------------------------|----------------------------------------------|-----------------------------------------------|----------------------------------------------|
|                        |                                        | <i>OXTR</i>                                  | <i>AVPR1a</i>                                | <i>AVPR1b</i>                                 | <i>AVPR2</i>                                 |
| Armadillo              | <i>Dasyurus novemcinctus</i>           | JH570036:784,101-786,550 <sup>c</sup>        | JH565922:556,112-559,574 <sup>b</sup>        | JH570036:784,017-786,655 <sup>c</sup>         | JH582165:726,593-726,983 <sup>d</sup>        |
| Baboon                 | <i>Papio anubis</i>                    | 2:51,424,043-51,438,993 <sup>c</sup>         | 11:58,804,281-58,808,842 <sup>c</sup>        | 1:157,797,540-157,803,573 <sup>c</sup>        | X:141,377,448-141,379,013 <sup>c</sup>       |
| Bushbaby               | <i>Otolemur garnettii</i>              | GL873534.1:2342065-2358892:1 <sup>a</sup>    | GL873657.1:1899023-1902474:-1 <sup>a</sup>   | GL873574.1:3114139-3119132:1 <sup>a</sup>     | GL873768.1:708867-710781:1 <sup>a</sup>      |
| Cat                    | <i>Felis catus</i>                     | A2:49379828-49397678:-1 <sup>a</sup>         | B4:91171687-91175144:-1 <sup>a</sup>         | F1:43714510-43720039:-1 <sup>a</sup>          | X:124716115-124717412:1 <sup>a</sup>         |
| Chimpanzee             | <i>Pan troglodytes</i>                 | 3:8934843-8953915:-1 <sup>a</sup>            | 12:26138951-26146969:1 <sup>a</sup>          | 1:185210857-185218136:-1 <sup>a</sup>         | X:154592309-154594400:1 <sup>a</sup>         |
| Cow                    | <i>Bos taurus</i>                      | 22:17817626-17827292:1 <sup>a</sup>          | 5:50592290-50595766:1 <sup>a</sup>           | 16:3726354-3731874:-1 <sup>a</sup>            | X:40036423-40038823:1 <sup>a</sup>           |
| Dog                    | <i>Canis lupus familiaris</i>          | 20:9358197-9378248:1 <sup>a</sup>            | 10:6264789-6269662:-1 <sup>a</sup>           | 38:2440633-2446082:-1 <sup>a</sup>            | X:121752780-121754771:1 <sup>a</sup>         |
| Elephant               | <i>Loxodonta africana</i>              | scaffold_12:38254308-38286930:1 <sup>a</sup> | scaffold_2:52880385-52883832:-1 <sup>a</sup> | scaffold_13:11192320-11197748:-1 <sup>a</sup> | scaffold_120:2147361-2148562:-1 <sup>a</sup> |
| Ferret                 | <i>Mustela putorius furo</i>           | GL896899.1:31840028-31948723:-1 <sup>a</sup> | GL897020.1:3747775-3751757:1 <sup>a</sup>    | GL896951.1:8943499-8948417:-1 <sup>a</sup>    | GL897267.1:201524-203187:1 <sup>a</sup>      |
| Gibbon                 | <i>Nomascus leucogenys</i>             | GL397298.1:16339634-16360389:-1 <sup>a</sup> | GL397261.1:49510312-49520425:1 <sup>a</sup>  | GL397352.1:94927-102313:-1 <sup>a</sup>       | GL397458.1:518385-520482:1 <sup>a</sup>      |
| Gorilla                | <i>Gorilla gorilla gorilla</i>         | 3:9043790-9060305:-1 <sup>a</sup>            | 12:61405397-61409230:-1 <sup>a</sup>         | 1:186190900-186198207:1 <sup>a</sup>          | X:151892588-151894682:1 <sup>a</sup>         |
| Guinea Pig             | <i>Cavia porcellus</i>                 | scaffold_87:1912214-1924192:1 <sup>a</sup>   | scaffold_9:35043412-35046721:1 <sup>a</sup>  | scaffold_12:16779491-16788717:1 <sup>a</sup>  | scaffold_148:1815080-1816468:-1 <sup>a</sup> |
| Horse                  | <i>Equus caballus</i>                  | 16:7978752-7994543:1 <sup>a</sup>            | 6:79470329-79473986:-1 <sup>a</sup>          | 5:2416813-2424080:-1 <sup>a</sup>             | X:122356320-122357636:1 <sup>a</sup>         |
| Human                  | <i>Homo sapiens</i>                    | 3: 8,792,094-8,811,314 <sup>a</sup>          | 12: 63,539,014-63,544,722 <sup>a</sup>       | 1: 206,223,976-206,231,639 <sup>a</sup>       | X: 153,167,985-153,172,620 <sup>a</sup>      |
| Kangaroo rat           | <i>Dipodomys ordii</i>                 | scaffold_17231:11075-22474:1 <sup>a</sup>    | scaffold_22850:14404-17904:-1 <sup>a</sup>   | scaffold_14784:13772-19597:-1 <sup>a</sup>    | scaffold_2502:8231-9676:1 <sup>a</sup>       |
| Lesser hedgehog tenrec | <i>Echinops telfairi</i>               | scaffold_7583: 30,612-34,235 <sup>a</sup>    | JH980300:69,823,458-69,827,381 <sup>c</sup>  | JH980299:32,534,576-32,540,588 <sup>c</sup>   | JH980299:32,534,593-32,540,501 <sup>c</sup>  |
| Macaque                | <i>Macaca mulatta</i>                  | 2:52233185-52248347:1 <sup>a</sup>           | 11:60385085-60388662:-1 <sup>a</sup>         | 1:164231937-164238892:1 <sup>a</sup>          | X:152025855-152027027:1 <sup>a</sup>         |
| Manatee                | <i>Trichechus manatus latirostris</i>  | JH594607:8,611,837-8,643,861 <sup>c</sup>    | JH594692:9,606,138-9,610,156 <sup>c</sup>    | JH594641:9,296,834-9,302,481 <sup>d</sup>     | JH594692:9,606,713-9,607,150 <sup>c</sup>    |
| Marmoset               | <i>Callithrix jacchus</i>              | 15: 60,672,911-60,688,438 <sup>a</sup>       | 9:52,395,838-52,399,124 <sup>c</sup>         | 19:28,142,077-28,149,505 <sup>c</sup>         | X: 140,442,277-140,443,205 <sup>a</sup>      |
| Megabat                | <i>Pteropus vampyrus</i>               | scaffold_3394:60991-76592:-1 <sup>a</sup>    | scaffold_5495:44926-48380:-1 <sup>a</sup>    | scaffold_3164:7745-9572:1 <sup>a</sup>        | scaffold_3867:45661-47320:1 <sup>a</sup>     |
| Microbat               | <i>Myotis lucifugus</i>                | GL429775:16113316-16130498:1 <sup>a</sup>    | GL429956:91339-95204:-1 <sup>a</sup>         | GL429912:1435434-1437638:-1 <sup>a</sup>      | GL429807:619705-621296:-1 <sup>a</sup>       |
| Mouse                  | <i>Mus musculus</i>                    | 6:112473684-112489808:-1 <sup>a</sup>        | 10:122448499-122453453:1 <sup>a</sup>        | 1:131599239-131612000:1 <sup>a</sup>          | X:73892102-73895502:1 <sup>a</sup>           |
| Naked mole-rat         | <i>Heterocephalus glaber</i>           | JH602044:3,370,683-3,384,804 <sup>c</sup>    | JH602115:4,894,523-4,897,919 <sup>c</sup>    | JH602120:5,237,036-5,241,760 <sup>c</sup>     | JH602259:541,899-543,032 <sup>c</sup>        |
| Orangutan              | <i>Pongo abelii</i>                    | 3: 61,221,011-61,236,340 <sup>a</sup>        | 12:63,230,436-63,233,748 <sup>c</sup>        | 1: 44,067,955-44,074,792 <sup>a</sup>         | 1:44,068,211-44,074,543 <sup>d*</sup>        |
| Orca                   | <i>Orcinus orca</i>                    | XM_004274790.1 <sup>c</sup>                  | XM_004276585.1 <sup>c</sup>                  | XM_004282434.1 <sup>c</sup>                   | XM_004286432.1 <sup>c</sup>                  |
| Panda                  | <i>Ailuropoda melanoleuca</i>          | GL192752.1:988763-1005431:-1 <sup>a</sup>    | GL192683.1:339899-343408:1 <sup>a</sup>      | GL193859.1:174036-178969:1 <sup>a</sup>       | GL193934.1:263280-264996:-1 <sup>a</sup>     |
| Pig                    | <i>Sus scrofa</i>                      | 13:72419130-72434787:-1 <sup>a</sup>         | 5:30643445-30647686:-1 <sup>a</sup>          | 9:73020218-73023991:-1 <sup>a</sup>           | X:142203295-142205695:1 <sup>a</sup>         |
| Pika                   | <i>Ochotona princeps</i>               | scaffold_368: 202,694-214,098 <sup>a</sup>   | scaffold_15380:45,643-45,937 <sup>c</sup>    | scaffold_198:4,918-8,501 <sup>c</sup>         | scaffold_198:5,153-8,297 <sup>c</sup>        |
| Rabbit                 | <i>Oryctolagus cuniculus</i>           | GL018703:223681-234789:1 <sup>a</sup>        | 4:42141558-42149565:-1 <sup>a</sup>          | 16:66192701-66196755:1 <sup>a</sup>           | GL018816:535306-537985:-1 <sup>a</sup>       |
| Rat                    | <i>Rattus norvegicus</i>               | 4:207703615-207716373:-1 <sup>a</sup>        | 7:67528203-67532266:-1 <sup>a</sup>          | 13:53443235-53453450:1 <sup>a</sup>           | 1:152637478-152639106:-1 <sup>a</sup>        |
| Rhinoceros             | <i>Ceratotherium simum simum</i>       | JH767842:234,877-251,435 <sup>a</sup>        | JH767750:20,542,259-20,546,534 <sup>c</sup>  | JH767737:31,932,525-31,937,567 <sup>c</sup>   | JH767842:235,003-235,413 <sup>c</sup>        |
| Sheep                  | <i>Ovis aries</i>                      | 19:17656099-17664613:1 <sup>a</sup>          | 3:156234256-156237118:1 <sup>a</sup>         | 12:3,157,164-3,162,772 <sup>c</sup>           | JH921656.1:16006-17521:1 <sup>a</sup>        |
| Shrew                  | <i>Sorex araneus</i>                   | scaffold_153104:4,229-4,310 <sup>c</sup>     | scaffold_247307:186-1,060 <sup>c</sup>       | scaffold_233098:39,285-40,192 <sup>c</sup>    | scaffold_2713: 5-1,189 <sup>a</sup>          |
| Squirrel               | <i>Ictidomys tridecemlineatus</i>      | JH393412.1:4242983-4258110:1 <sup>a</sup>    | JH393355.1:1790988-1795450:-1 <sup>a</sup>   | JH393367.1:6416062-6421547:1 <sup>a</sup>     | JH393619.1:788990-790674:1 <sup>a</sup>      |
| Squirrel monkey        | <i>Saimiri boliviensis boliviensis</i> | JH378125:19,963,441-19,977,143 <sup>c</sup>  | JH378123:6,306,524-6,310,202 <sup>c</sup>    | JH378142:19,163,569-19,170,664 <sup>c</sup>   | JH378125:19,963,567-19,976,990 <sup>c</sup>  |

Database: <sup>a</sup>Ensemble; <sup>b</sup>UCSC; <sup>c</sup>NCBI; <sup>d</sup>Uniprot; \**Pongo pygmaeus*.
