# Supplementary material for: Oxytocin and arginine vasopressin receptor evolution: implications for adaptive novelties in placental mammals
Source: PubMed Central journal article supplement (PMC5127151; doi:10.1590/1678-4685-gmb-2015-0323), 2016-08-08
Supplement: 1415-4757-gmb-1678-4685-GMB-2015-0323-Suppl02.pdf [file 1415-4757-gmb-1678-4685-GMB-2015-0323-Suppl02.pdf]

**Table S2**

Estimated parameters under different codon substitution models for *OXTR*, *AVPR1a*, *AVPR1b*, and *AVPR2*.

|        | Model                  | dN/dS  | Estimated parameters                                                                                                    | $\ell$    | p value |
|--------|------------------------|--------|-------------------------------------------------------------------------------------------------------------------------|-----------|---------|
| AVPR1a | M1a: Nearly Neutral    | 0.2000 | $p_0=0.84972$ , ( $p_1=0.15028$ )<br>( $\omega_0=0.05852$ ), ( $\omega_1=1.00000$ )                                     | -10155.10 | >0.999  |
|        | M2a: Selection         | 0.2000 | $p_0=0.84972$ , $p_1=0.12155$ , ( $p_2=0.02873$ )<br>( $\omega_0=0.05852$ ), ( $\omega_1=1.00000$ ), $\omega_2=1.00000$ | -10155.10 |         |
| AVPR1b | M1a: Nearly Neutral    | 0.2104 | $p_0=0.85767$ , ( $p_1=0.14233$ )<br>( $\omega_0=0.07939$ ), ( $\omega_1=1.00000$ )                                     | -11068.99 | 0.4     |
|        | M2a: Selection         | 0.1247 | $p_0=0.85731$ , $p_1=0.13855$ , ( $p_2=0.00414$ )<br>( $\omega_0=0.07985$ ), ( $\omega_1=1.00000$ ), $\omega_2=2.65042$ | -11068.11 |         |
| AVPR2  | M1a: Nearly Neutral    | 0.1678 | $p_0=0.86382$ , ( $p_1=0.13618$ )<br>( $\omega_0=0.03663$ ), ( $\omega_1=1.00000$ )                                     | -5563.60  | >0.999  |
|        | M2a: Selection         | 0.1678 | $p_0=0.86381$ , $p_1=0.00588$ , ( $p_2=0.13030$ )<br>( $\omega_0=0.03663$ ), ( $\omega_1=1.00000$ ), $\omega_2=1.00000$ | -5563.60  |         |
| OXTR   | M7: $\beta$            | 0.0617 | [ $p=0.17515$ , $q=2.45228$ ]<br>$p_0=0.99688$ ,                                                                        | -4316.14  | >0.999  |
|        | M8: $\beta$ & $\omega$ | 0.0620 | ( $p_2=0.00312$ ), $\omega_2=1.00000$                                                                                   | -4316.09  |         |

$p_0$  = proportion of sites where  $\omega < 1$ ,  $p_1$  = proportion of sites where  $\omega = 1$ , and  $p_2$  = proportion of sites where  $\omega > 1$  (selection models only);  $\omega_0 < 1$  (negative selection),  $\omega_1 \cong 1$  (neutral or relaxing selection), and  $\omega_2 > 1$  (positive selection).  $\ell$  = Log likelihood values. Likelihood ratio tests were performed between neutral models (M1a- nearly neutral, and M7 - beta) and models that identify positive selection (M2a - selection, and M8,  $\beta$  &  $\omega$  - beta +selection). The comparisons M1 vs M2 and M7 vs M8 had 2 degrees of freedom. Within parentheses: fixed parameters; within brackets:  $\beta$  parameters p and q. dN/dS = non-synonymous/synonymous rate ratio.
