# Supplementary material for: Oxytocin and arginine vasopressin receptor evolution: implications for adaptive novelties in placental mammals
Source: PubMed Central journal article supplement (PMC5127151; doi:10.1590/1678-4685-gmb-2015-0323), 2016-08-08
Supplement: 1415-4757-gmb-1678-4685-GMB-2015-0323-Suppl08.pdf [file 1415-4757-gmb-1678-4685-GMB-2015-0323-Suppl08.pdf]

**Table S8**

Mann-Whitney test results for pairwise comparisons between mammalian orders of AVPR2 C-terminal regions with regard to their intrinsic disorder degree content.

| Orders          | Primates | Rodentia | Lagomorpha | Cetartiodactyla | Carnivora | Perissodactyla | Chiroptera | Eulipotyphyla | Cingulata | Afrosoricida | Sirenia | Proboscidea |
|-----------------|----------|----------|------------|-----------------|-----------|----------------|------------|---------------|-----------|--------------|---------|-------------|
| Primates        |          | 0.004    | 0.338      | 0.185           | 0.05      | 0.067          | 0.039      | 0.085         | 0.301     | 0.12         | 0.301   | 0.168       |
|                 |          | 0.264*   | 22.308*    | 12.21*          | 3.3*      | 4.422*         | 2.574*     | 5.61*         | 19.866*   | 7.92*        | 19.87*  | 11.088*     |
| Rodentia        |          |          | 0.094      | 0.282           | 0.588     | 0.495          | 0.495      | 0.203         | 0.13      | 0.13         | 0.13    | 0.13        |
|                 |          |          | 6.204*     | 18.612*         | 38.808*   | 32.67*         | 32.67*     | 13.398*       | 8.58*     | 8.58*        | 8.58*   | 8.58*       |
| Lagomorpha      |          |          |            | 0.643           | 0.481     | 0.439          | 0.121      | 0.221         | 0.221     | 0.221        | 0.221   | 1           |
|                 |          |          |            | 42.438*         | 31.746*   | 28.974*        | 7.986*     | 14.586*       | 14.586*   | 14.586*      | 14.59*  | 1           |
| Cetartiodactyla |          |          |            |                 | 0.564     | 0.643          | 0.165      | 0.157         | 0.48      | 0.157        | 0.48    | 0.48        |
|                 |          |          |            |                 | 37.224*   | 42.438*        | 10.89*     | 10.362*       | 31.68*    | 10.362*      | 31.68*  | 31.68*      |
| Carnivora       |          |          |            |                 |           | 0.481          | 0.277      | 0.157         | 0.157     | 0.157        | 0.157   | 0.48        |
|                 |          |          |            |                 |           | 31.746*        | 18.282*    | 10.362*       | 10.362*   | 10.362*      | 10.36*  | 31.68*      |
| Perissodactyla  |          |          |            |                 |           |                | 0.221      | 0.221         | 0.221     | 0.221        | 0.221   | 0.221       |
|                 |          |          |            |                 |           |                | 14.586*    | 14.586*       | 14.586*   | 14.586*      | 14.59*  | 14.586*     |
| Chiroptera      |          |          |            |                 |           |                |            | 0.221         | 0.221     | 0.221        | 0.221   | 0.221       |
|                 |          |          |            |                 |           |                |            | 14.586*       | 14.586*   | 14.586*      | 14.59*  | 14.586*     |
| Eulipotyphyla   |          |          |            |                 |           |                |            |               | 0.317     | 0.317        | 0.317   | 0.317       |
|                 |          |          |            |                 |           |                |            |               | 20.922*   | 20.922*      | 20.92*  | 20.922*     |
| Cingulata       |          |          |            |                 |           |                |            |               |           | 0.317        | 0.317   | 0.317       |
|                 |          |          |            |                 |           |                |            |               |           | 20.922*      | 20.92*  | 20.922*     |
| Afrosoricida    |          |          |            |                 |           |                |            |               |           |              | 0.317   | 0.317       |
|                 |          |          |            |                 |           |                |            |               |           |              | 20.92*  | 20.922*     |
| Sirenia         |          |          |            |                 |           |                |            |               |           |              |         | 0.317       |
|                 |          |          |            |                 |           |                |            |               |           |              |         | 20.922*     |
| Proboscidea     |          |          |            |                 |           |                |            |               |           |              |         |             |

\**p* values after Bonferroni corrections.
