# Supplementary material for: Oxytocin and arginine vasopressin receptor evolution: implications for adaptive novelties in placental mammals
Source: PubMed Central journal article supplement (PMC5127151; doi:10.1590/1678-4685-gmb-2015-0323), 2016-08-08
Supplement: 1415-4757-gmb-1678-4685-GMB-2015-0323-Suppl09.pdf [file 1415-4757-gmb-1678-4685-GMB-2015-0323-Suppl09.pdf]

|                  |              |     |  |   |   |   |  |   |   |
|------------------|--------------|-----|--|---|---|---|--|---|---|
| AAA-> <u>ACG</u> | 372 Lys->Thr | 78  |  |   |   | 1 |  | 1 | 1 |
| AAA-> <u>AAC</u> | 372 Lys->Asn | 94  |  | 1 | 1 |   |  |   |   |
| AAA-> <u>ATA</u> | 372 Lys->Ile | 102 |  |   | 1 |   |  |   |   |
| AAA-> <u>GCA</u> | 372 Lys->Ala | 106 |  |   |   |   |  |   | 1 |

Sites identified in the Bayes Empirical Bayes (BEB) analysis with a probability higher than 65% of being under  $\omega > 1$ , which indicates positive selection. + Positively selected sites ( $p > 95\%$ ); bold text indicates positively selected sites ( $p > 99\%$ ). AVPR1a regions: N-terminal= Amino-terminus; and ECL 3 = Extracellular 3. Zero (0) indicates the amino acid present in the *Homo sapiens* reference sequence, whereas 1 indicates a variant amino acid.

The nature of the modification does not represent an ancestry and descendant relationship. Grantham scores are predicted as conservative (0–50), moderately conservative (51–100), moderately radical (101–150), or radical (>151). Subscripted letters indicate the predicted presence of specific Eukaryotic Linear Motifs (as depicted using the code shown in Table S11). Scientific names of the species can be found in Table S1.
