# Supplementary material for: Oxytocin and arginine vasopressin receptor evolution: implications for adaptive novelties in placental mammals
Source: PubMed Central journal article supplement (PMC5127151; doi:10.1590/1678-4685-gmb-2015-0323), 2016-08-08
Supplement: 1415-4757-gmb-1678-4685-GMB-2015-0323-Suppl10.pdf [file 1415-4757-gmb-1678-4685-GMB-2015-0323-Suppl10.pdf]

**Table S10**

Amino acid changes at the AVPR2 positions with a higher probability (> 65%) of being under positive selection and/or having relaxed functional constraints.

| Protein region | Nucleotide   | Amino acid   | Grantham score | Mammalian species |                  |                  |                  |                  |                  |                  |                 |                |          |                |                  |                  |                 |            |                |        |      |      |     |       |                 |       |        |                 |                 |                |                 |          |         |                  |                 |                |
|----------------|--------------|--------------|----------------|-------------------|------------------|------------------|------------------|------------------|------------------|------------------|-----------------|----------------|----------|----------------|------------------|------------------|-----------------|------------|----------------|--------|------|------|-----|-------|-----------------|-------|--------|-----------------|-----------------|----------------|-----------------|----------|---------|------------------|-----------------|----------------|
|                |              |              |                | Human             | Chimpanzee       | Gorilla          | Orangutan        | Gibbon           | Macaque          | Baboon           | Squirrel monkey | Marmoset       | Bushbaby | Mouse          | Rat              | Kangaroo rat     | Naked mole rat  | Guinea pig | Squirrel       | Rabbit | Plka | Orca | Cow | Sheep | Pig             | Panda | Ferret | Dog             | Cat             | Horse          | Rhinoceros      | Microbat | Megabat | Shrew            | Manatee         | Elephant       |
| ICL3           | AGG->GTA     | 249 Arg->Val | 96             | 0 <sub>abd</sub>  | 0 <sub>abd</sub> | 0 <sub>abd</sub> | 0 <sub>abd</sub> | 0 <sub>abd</sub> | 0 <sub>abd</sub> | 0 <sub>abd</sub> |                 |                |          |                |                  |                  |                 |            | 1 <sub>a</sub> |        | 0    | 0    | 0   |       |                 |       |        |                 |                 |                | 0 <sub>ab</sub> | 0        |         |                  |                 | 0 <sub>a</sub> |
|                | AGG->CCG     | 249 Arg->Pro | 103            |                   |                  |                  |                  |                  |                  |                  | 1 <sub>a</sub>  | 1 <sub>a</sub> |          |                |                  |                  |                 |            |                |        |      |      |     |       |                 |       |        |                 |                 |                |                 |          |         |                  |                 |                |
|                | AGG->AGC     | 249 Arg->Ser | 110            |                   |                  |                  |                  |                  |                  |                  |                 |                |          |                |                  |                  |                 |            |                |        |      |      |     |       |                 |       |        |                 |                 |                |                 |          |         | 1 <sub>abd</sub> |                 |                |
|                | AGG->GGG     | 249 Arg->Gly | 125            |                   |                  |                  |                  |                  |                  |                  |                 |                |          |                |                  |                  |                 |            |                |        |      |      |     |       | 1               |       |        |                 | 1               |                |                 |          |         |                  |                 |                |
|                | AGG->GGA     | 249 Arg->Gly | 125            |                   |                  |                  |                  |                  |                  |                  |                 |                |          |                |                  |                  |                 |            |                |        |      |      |     |       | 1               | 1     | 1      | 1               |                 | 1 <sub>a</sub> |                 |          |         |                  |                 |                |
|                | AGG->GGC     | 249 Arg->Gly | 125            |                   |                  |                  |                  |                  |                  |                  |                 |                |          |                |                  |                  |                 |            |                |        |      |      |     |       |                 |       |        |                 |                 |                |                 |          |         | 1 <sub>ad</sub>  | 1 <sub>a</sub>  |                |
|                | GGT->AGT     | 257 Gly->Ser | 56             | 0 <sub>fig</sub>  | 0 <sub>fig</sub> | 0 <sub>fig</sub> | 0 <sub>fig</sub> | 0 <sub>fig</sub> | 1                | 0                |                 |                |          |                | 1 <sub>g</sub>   |                  |                 |            |                |        |      |      |     |       | 1 <sub>eg</sub> |       |        |                 | 1 <sub>eg</sub> |                | 0               | 0        | 1       |                  |                 |                |
|                | GGT->AGC     | 257 Gly->Ser | 56             |                   |                  |                  |                  |                  |                  |                  |                 | 1              | 1        | 1 <sub>g</sub> | 1 <sub>efg</sub> | 1 <sub>efg</sub> |                 |            |                |        |      |      |     |       |                 | 1     |        | 1 <sub>eg</sub> | 1 <sub>eg</sub> |                |                 |          |         | 1                | 1               |                |
|                | GGT->ICC     | 257 Gly->Ser | 56             |                   |                  |                  |                  |                  |                  |                  |                 |                |          |                |                  |                  |                 |            |                |        |      |      |     |       |                 |       |        |                 |                 |                |                 |          | 1       |                  |                 |                |
| GGT->GCC       | 257 Gly->Ala | 60           |                |                   |                  |                  |                  |                  |                  |                  |                 |                |          |                |                  |                  |                 |            |                |        |      |      |     |       |                 |       |        |                 |                 |                |                 |          |         |                  |                 |                |
| GGT->GCT       | 257 Gly->Ala | 60           |                |                   |                  |                  |                  |                  |                  |                  |                 |                |          |                |                  |                  |                 |            |                |        |      |      |     |       |                 |       |        |                 |                 |                |                 |          |         |                  |                 |                |
| GGT->CAT       | 257 Gly->His | 98           |                |                   |                  |                  |                  |                  |                  |                  |                 |                |          |                |                  |                  |                 |            |                |        |      |      |     |       |                 |       |        |                 |                 |                |                 |          |         |                  |                 |                |
| GGT->CGC       | 257 Gly->Arg | 125          |                |                   |                  |                  |                  |                  |                  |                  |                 |                |          |                |                  |                  |                 |            |                |        |      |      |     |       |                 |       |        |                 |                 |                |                 |          |         |                  | 1               |                |
| GGT->AGA       | 257 Gly->Arg | 125          |                |                   |                  |                  |                  |                  |                  |                  |                 |                |          |                | 1 <sub>g</sub>   | 1 <sub>g</sub>   | 1 <sub>eg</sub> |            |                |        |      |      |     |       |                 |       |        |                 |                 |                |                 |          |         |                  |                 |                |
| TM6            | GTC->ATA     | 278 Val->Ile | 29             | 0                 | 0                | 0                | 0                | 0                | 0                | 0                |                 | 0              |          |                |                  |                  |                 |            |                |        |      |      |     |       |                 |       |        |                 |                 |                |                 |          |         |                  |                 |                |
|                | GTC->ATT     | 278 Val->Ile | 29             |                   |                  |                  |                  |                  |                  |                  |                 |                |          |                |                  |                  |                 |            |                |        |      |      |     |       |                 |       |        |                 |                 |                |                 |          |         |                  |                 | 1              |
|                | GTC->ATC     | 278 Val->Ile | 29             |                   |                  |                  |                  |                  |                  |                  |                 |                |          |                |                  |                  |                 |            |                |        |      |      |     |       |                 |       |        |                 |                 |                |                 |          |         |                  |                 |                |
|                | GTC->GTA     | 278 Val->Ile | 29             |                   |                  |                  |                  |                  |                  |                  |                 | 1              |          |                |                  |                  |                 |            |                |        |      |      |     |       |                 |       |        |                 |                 |                |                 |          |         |                  |                 |                |
|                | GTC->GCT     | 278 Val->Ala | 64             |                   |                  |                  |                  |                  |                  |                  |                 |                |          |                |                  |                  |                 |            |                |        |      |      |     |       |                 |       |        |                 |                 |                |                 |          |         |                  |                 |                |
| C-terminal     | GGA->AGT     | 345 Gly->Ser | 56             | 0 <sub>j</sub>    | 0 <sub>j</sub>   | 0                | 0                | 0                | 0                | 0                |                 |                |          |                |                  |                  |                 |            |                |        |      |      |     |       | 0               | 1     | 1      |                 |                 |                |                 |          |         |                  |                 |                |
|                | GGA->AGC     | 345 Gly->Ser | 56             |                   |                  |                  |                  |                  |                  |                  |                 |                |          |                |                  | 1 <sub>j</sub>   |                 |            |                |        |      |      |     |       |                 |       |        |                 |                 |                |                 |          |         |                  |                 |                |
|                | GGA->GGC     | 345 Gly->Ser | 56             |                   |                  |                  |                  |                  |                  |                  |                 |                |          |                |                  |                  | 1 <sub>j</sub>  |            |                |        |      |      |     |       |                 |       |        |                 |                 |                |                 |          |         |                  |                 |                |
|                | GGA->ACG     | 345 Gly->Thr | 59             |                   |                  |                  |                  |                  |                  |                  |                 |                |          |                |                  |                  |                 |            |                |        |      |      |     |       |                 |       |        |                 |                 |                |                 |          |         |                  |                 |                |
|                | GGA->GCA     | 345 Gly->Ala | 60             |                   |                  |                  |                  |                  |                  |                  |                 |                |          |                |                  |                  |                 |            |                |        |      |      |     |       |                 |       |        |                 |                 |                |                 |          |         |                  | 1 <sub>j</sub>  |                |
|                | GGA->GCC     | 345 Gly->Ala | 60             |                   |                  |                  |                  |                  |                  |                  |                 |                |          |                |                  |                  |                 |            |                |        |      |      |     |       |                 |       |        |                 |                 |                |                 |          |         |                  |                 | 1              |
|                | GGA->GTA     | 345 Gly->Val | 109            |                   |                  |                  |                  |                  |                  |                  |                 |                |          |                |                  |                  |                 |            |                |        |      |      |     |       |                 |       |        |                 |                 |                |                 |          |         |                  |                 |                |
|                | GGA->AGG     | 345 Gly->Arg | 125            |                   |                  |                  |                  |                  |                  |                  |                 |                |          |                |                  |                  |                 |            |                |        |      |      |     |       |                 |       |        |                 |                 |                |                 |          |         |                  |                 |                |
| GGA->AAA       | 345 Gly->Lys | 127          |                |                   |                  |                  |                  |                  |                  |                  |                 |                |          |                |                  |                  |                 |            |                |        |      |      |     |       |                 |       |        |                 |                 |                |                 |          |         |                  | 1 <sub>ah</sub> |                |

Sites identified in the Bayes Empirical Bayes (BEB) analysis with a probability higher than 65% of being under  $\omega > 1$ , which indicates positive selection. + Positively selected sites ( $p > 95\%$ ); bold text indicates positively selected sites ( $p > 99\%$ ). AVPR2 regions: ICL 3 = Intracellular 3; TM 6 = Transmembrane 6; and C-terminal = Carboxy-terminus. Zero (0) indicates the amino acid present in the *Homo sapiens* reference sequence, whereas 1 indicates a variant amino acid.

The nature of the modification does not represent an ancestry and descendant relationship. Grantham scores are predicted as conservative (0–50), moderately conservative (51–100), moderately radical (101–150), or radical (>151). Subscripted letters indicate the predicted presence of specific Eukaryotic Linear Motifs (as depicted using the code shown in Table S11). Scientific names of the species can be found in Table S1.
