# Supplementary material for: Oxytocin and arginine vasopressin receptor evolution: implications for adaptive novelties in placental mammals
Source: PubMed Central journal article supplement (PMC5127151; doi:10.1590/1678-4685-gmb-2015-0323), 2016-08-08
Supplement: 1415-4757-gmb-1678-4685-GMB-2015-0323-Suppl12.pdf [file 1415-4757-gmb-1678-4685-GMB-2015-0323-Suppl12.pdf]

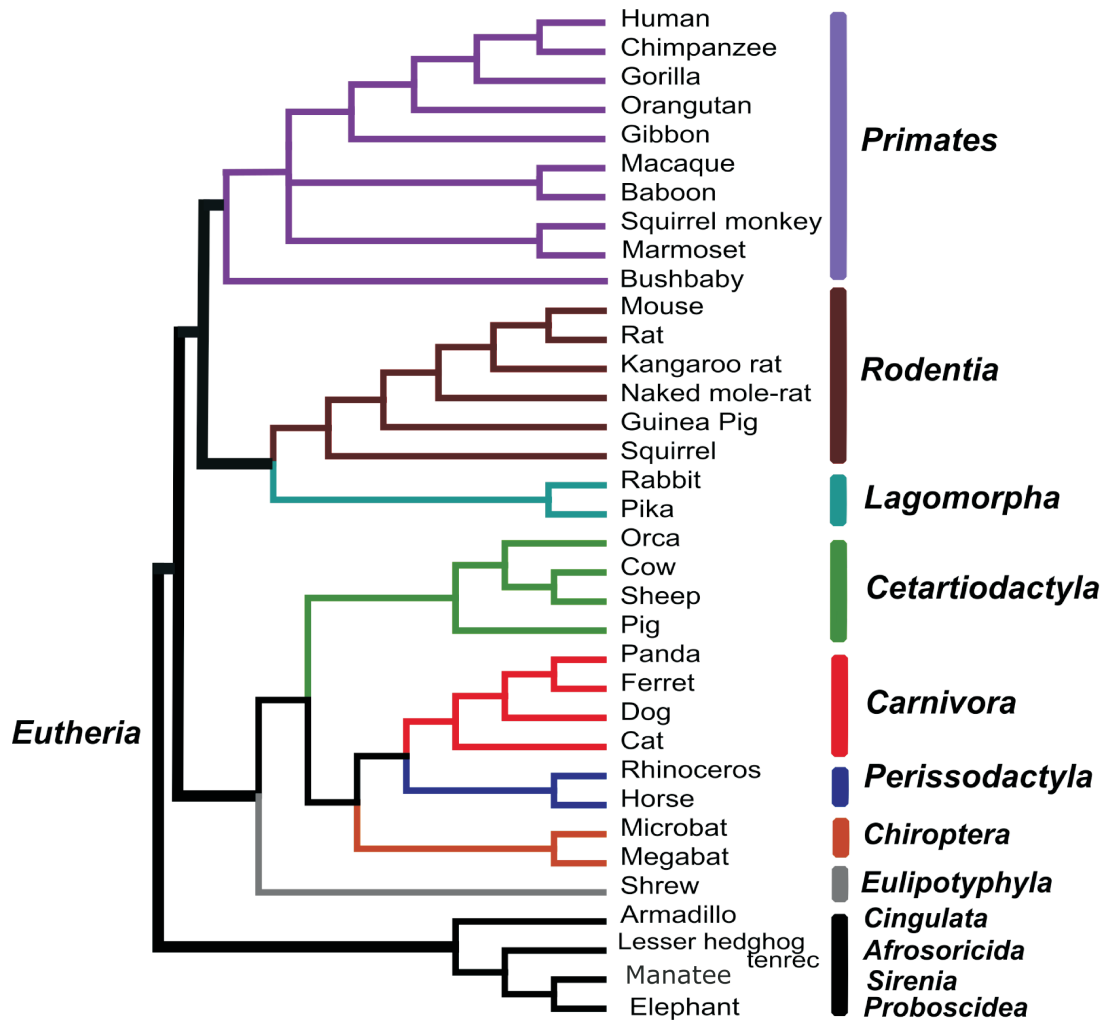

**Figure S1** - Phylogenetic tree topology used in the analysis of molecular evolution. The analysis included 35 placental mammalian species (as described in the Materials and Methods section).
