# Supplementary material for: Oxytocin and arginine vasopressin receptor evolution: implications for adaptive novelties in placental mammals
Source: Genet Mol Biol. 2016 Aug 8;39(4):646–57. doi: 10.1590/1678-4685-GMB-2015-0323 (PMC5127151; doi:10.1590/1678-4685-GMB-2015-0323)
Supplement: Supplementary file 4 [file 1415-4757-gmb-1678-4685-GMB-2015-0323-Suppl03.pdf]

### Table S3

Amino acid changes at the AVPR1b positions with a higher probability (> 65%) of being under positive selection and/or having relaxed functional constraints.

| Protein region    |                   |              |                | Mammalian species |            |         |           |        |         |        |                 |          |          |       |                 |                 |                |                |                |                |                |      |                |                |                |                |                |     |                 |                |            |          |                |                |                |          |                        |                |   |
|-------------------|-------------------|--------------|----------------|-------------------|------------|---------|-----------|--------|---------|--------|-----------------|----------|----------|-------|-----------------|-----------------|----------------|----------------|----------------|----------------|----------------|------|----------------|----------------|----------------|----------------|----------------|-----|-----------------|----------------|------------|----------|----------------|----------------|----------------|----------|------------------------|----------------|---|
|                   | Nucleotide        | Amino acid   | Grantham score | Human             | Chimpanzee | Gorilla | Orangutan | Gibbon | Macaque | Baboon | Squirrel monkey | Marmoset | Bushbaby | Mouse | Rat             | Kangaroo rat    | Naked mole rat | Guinea pig     | Squirrel       | Rabbit         | Pika           | Orca | Cow            | Sheep          | Pig            | Panda          | Ferret         | Dog | Cat             | Horse          | Rhinoceros | Microbat | Megabat        | Shrew          | Manatee        | Elephant | Lesser hedgehog tenrec | Armadillo      |   |
| N-terminal        | GAT-> <u>A</u> AT | 2Asp->Asn    | 23             | 0                 | 0          | 0       | 0         | 0      | 0       | 0      | 0               | 0        | 0        | 0     | 1               |                 | 1              | 0              | 0              | 0              |                | 0    | 0              | 0              | 0              | 0              | 0              |     | 0               | 0              | 0          | 0        | 0              | 0              | 0              | 0        | 0                      | 0              | 0 |
|                   | GAT-> <u>G</u> AA | 2Asp->Glu    | 45             |                   |            |         |           |        |         |        |                 |          |          |       |                 |                 |                |                |                |                |                |      |                |                |                |                |                |     |                 |                |            |          | 1              |                |                |          |                        |                |   |
|                   | GAT-> <u>G</u> AG | 2Asp->Glu    | 45             |                   |            |         |           |        |         |        |                 |          |          |       |                 |                 |                |                |                |                |                |      |                |                |                |                |                |     |                 |                |            |          |                |                |                |          |                        | 1              |   |
|                   | GAT-> <u>A</u> CT | 2Asp->Thr    | 85             |                   |            |         |           |        |         |        |                 |          |          |       |                 |                 |                |                |                |                |                |      |                |                |                |                |                | 1   |                 |                |            |          |                |                |                |          |                        |                |   |
|                   | GAT-> <u>G</u> GC | 2Asp->Gly    | 94             |                   |            |         |           |        |         |        |                 |          |          |       |                 |                 | 1              |                |                |                |                |      |                |                |                |                |                |     |                 |                |            |          |                |                |                |          |                        |                |   |
|                   | GAT-> <u>G</u> CT | 2Asp->Ala    | 126            |                   |            |         |           |        |         |        |                 |          |          |       |                 |                 |                |                |                |                |                |      |                |                |                |                |                |     |                 |                |            |          |                |                | 1              |          |                        |                |   |
|                   | GAT-> <u>G</u> TT | 2Asp->Val    | 152            |                   |            |         |           |        |         |        |                 |          |          |       |                 |                 |                |                |                |                | 1              |      |                |                |                |                |                |     |                 |                |            |          |                |                |                |          |                        |                |   |
|                   | GAT-> <u>A</u> AT | 8Asp->Asn +  | 23             | 0 <sub>j</sub>    | 0          | 0       |           | 0      | 0       | 0      | 0               | 1        | 1        |       |                 |                 |                |                |                |                |                |      |                |                |                |                |                |     |                 |                |            |          |                |                |                |          |                        |                |   |
|                   | GAT-> <u>G</u> AG | 8Asp->Glu +  | 45             |                   |            |         |           | 1      |         |        |                 |          |          |       |                 |                 |                |                |                |                | 1              |      |                |                |                |                |                |     |                 |                |            |          |                |                |                |          |                        |                |   |
|                   | GAT-> <u>A</u> CT | 8Asp->Thr +  | 85             |                   |            |         |           |        |         |        |                 |          |          |       | 1 <sub>kj</sub> | 1 <sub>kj</sub> |                |                |                | 1              |                |      |                |                |                |                |                |     |                 |                |            |          |                |                |                |          |                        |                |   |
|                   | GAT-> <u>AC</u> G | 8Asp->Thr +  | 85             |                   |            |         |           |        |         |        |                 |          |          |       |                 |                 |                |                |                |                |                |      | 1              |                | 1              |                |                |     |                 |                |            |          |                |                |                |          |                        |                |   |
|                   | GAT-> <u>GG</u> T | 8Asp->Gly +  | 94             |                   |            |         |           |        |         |        |                 |          |          |       |                 |                 |                |                |                |                |                |      |                |                |                |                |                |     |                 |                |            |          |                |                |                |          |                        |                |   |
|                   | GAT-> <u>G</u> CT | 8Asp->Ala +  | 126            |                   |            |         |           |        |         |        |                 |          |          | 1     |                 |                 |                | 1 <sub>k</sub> | 1 <sub>k</sub> |                |                |      |                |                |                |                | 1 <sub>j</sub> | 1   | 1 <sub>kj</sub> | 1 <sub>j</sub> | 1          | 1        | 1              | 1              | 1              | 1        | 1                      | 1              |   |
|                   | GAT-> <u>G</u> CA | 8Asp->Ala +  | 126            |                   |            |         |           |        |         |        |                 |          |          |       |                 |                 |                |                |                |                |                |      |                |                |                |                |                |     |                 |                |            |          |                | 1              |                |          |                        |                |   |
|                   | GAT-> <u>G</u> CG | 8Asp->Ala +  | 126            |                   |            |         |           |        |         |        |                 |          |          |       |                 |                 |                | 1              |                |                |                |      |                |                |                |                |                |     |                 |                |            |          |                |                |                |          |                        |                |   |
|                   | GAT-> <u>G</u> TT | 8Asp->Val+   | 152            |                   |            |         |           |        |         |        |                 |          |          |       |                 |                 |                |                |                |                | 1 <sub>j</sub> |      |                |                |                |                |                |     |                 |                |            |          |                |                |                |          |                        |                |   |
|                   | GAT-> <u>AT</u> C | 8Asp->Ile +  | 168            |                   |            |         |           |        |         |        |                 |          |          |       |                 |                 |                |                |                |                |                |      | 1 <sub>j</sub> |                |                |                |                |     |                 |                |            |          |                |                |                |          |                        |                |   |
|                   | GAT-> <u>TT</u> G | 8Asp->Leu +  | 172            |                   |            |         |           |        |         |        |                 |          |          |       |                 |                 |                |                |                |                |                |      |                |                |                | 1 <sub>j</sub> |                |     |                 |                |            |          |                |                |                |          |                        |                |   |
|                   | AAC-> <u>AG</u> C | 10Asn->Ser   | 46             | 0                 | 0          | 0       | 0         | 0      | 0       | 0      | 0               | 0        | 0        | 1     |                 |                 | 0              |                |                |                |                |      | 1              |                |                | 0              |                | 0   |                 | 0              | 0          | 0        | 0              | 0              |                |          |                        |                | 0 |
|                   | AAC-> <u>G</u> AC | 10Asn->Asp   | 23             |                   |            |         |           |        |         |        |                 |          |          |       |                 |                 |                |                |                |                |                |      |                |                |                |                |                |     |                 |                |            |          |                | 1 <sub>m</sub> |                |          |                        |                |   |
|                   | AAC-> <u>AG</u> C | 10Asn->Ser   | 46             |                   |            |         |           |        |         |        |                 |          |          |       |                 |                 |                |                |                |                |                |      |                |                |                |                | 1 <sub>l</sub> |     |                 |                |            |          |                |                |                |          |                        |                |   |
|                   | AAC-> <u>AG</u> C | 10Asn->Ser   | 46             |                   |            |         |           |        |         |        |                 |          |          |       |                 |                 |                |                |                |                |                |      |                |                |                |                |                |     | 1 <sub>l</sub>  |                |            |          |                |                |                |          |                        |                |   |
|                   | AAC-> <u>AG</u> T | 10Asn->Ser   | 46             |                   |            |         |           |        |         |        |                 |          |          |       |                 |                 |                |                |                |                | 1              | 1    |                |                |                |                |                |     |                 |                |            |          |                |                |                |          |                        |                |   |
|                   | AAC-> <u>C</u> AG | 10Asn->Gln   | 46             |                   |            |         |           |        |         |        |                 |          |          |       |                 |                 |                |                |                |                |                |      |                |                |                |                |                |     |                 |                |            |          |                |                | 1 <sub>l</sub> |          |                        |                |   |
|                   | AAC-> <u>T</u> CC | 10Asn->Ser   | 46             |                   |            |         |           |        |         |        |                 |          |          |       |                 |                 |                |                |                |                |                |      |                |                |                |                |                |     |                 |                |            |          |                |                | 1 <sub>l</sub> |          |                        |                |   |
|                   | AAC-> <u>AG</u> C | 10Asn->Ser   | 46             |                   |            |         |           |        |         |        |                 |          |          |       |                 |                 |                |                |                |                |                |      |                |                |                |                |                |     |                 |                |            |          |                |                |                |          |                        | 1 <sub>l</sub> |   |
|                   | AAC-> <u>ACC</u>  | 10Asn->Thr   | 65             |                   |            |         |           |        |         |        |                 |          |          |       | 1 <sub>l</sub>  | 1 <sub>l</sub>  |                |                |                |                |                |      |                |                |                |                |                |     |                 |                |            |          |                |                |                |          |                        |                |   |
|                   | AAC-> <u>ACC</u>  | 10Asn->Thr   | 65             |                   |            |         |           |        |         |        |                 |          |          |       |                 |                 |                |                |                |                |                |      |                |                |                |                |                |     |                 |                |            |          |                |                |                |          | 1 <sub>l</sub>         |                |   |
|                   | AAC-> <u>G</u> CT | 10Asn->Ala   | 111            |                   |            |         |           |        |         |        |                 |          |          |       |                 |                 |                | 1              |                |                |                |      |                | 1 <sub>l</sub> | 1 <sub>l</sub> |                |                |     |                 |                |            |          |                |                |                |          |                        |                |   |
|                   | AAC-> <u>A</u> TC | 10Asn->Ile   | 133            |                   |            |         |           |        |         |        |                 |          |          |       |                 |                 |                |                | 1              |                |                |      |                |                |                |                |                |     |                 |                |            |          |                |                |                |          |                        |                |   |
|                   | AAC-> <u>A</u> TA | 10Asn->Ile   | 149            |                   |            |         |           |        |         |        |                 |          |          |       |                 |                 |                |                |                | 1 <sub>l</sub> |                |      |                |                |                |                |                |     |                 |                |            |          |                |                |                |          |                        |                |   |
|                   | CTG-> <u>C</u> AG | 14Arg->Gln   | 43             | 0                 | 0          | 0       | 0         |        |         |        |                 |          |          | 1     |                 |                 | 0              | 1              | 1              |                |                |      |                |                |                |                |                | 1   |                 |                |            |          |                |                |                |          |                        |                |   |
| CTG-> <u>G</u> AA | 14Arg->Glu        | 54           |                |                   |            |         |           |        |         |        |                 |          |          |       |                 |                 |                |                |                |                | 1              |      |                |                |                |                |                |     |                 |                |            |          |                |                |                |          |                        |                |   |
| CTG-> <u>G</u> AG | 14Arg->Glu        | 54           |                |                   |            |         |           |        |         |        |                 |          |          |       |                 |                 |                |                |                |                |                |      |                |                |                |                |                |     |                 |                |            |          |                |                | 1              |          |                        |                |   |
| CTG-> <u>T</u> GG | 14Arg->Trp        | 101          |                |                   |            |         |           |        | 1       | 1      |                 |          |          |       |                 |                 |                |                |                |                |                |      |                |                |                |                |                |     |                 |                | 1          |          |                |                |                |          |                        |                |   |
| CTG-> <u>C</u> TG | 14Arg->Leu        | 102          |                |                   |            |         |           |        |         |        |                 |          |          |       |                 |                 |                |                |                |                |                |      |                |                |                | 1              |                |     |                 |                |            |          |                |                |                |          |                        |                |   |
| CTG-> <u>G</u> GG | 14Arg->Gly        | 125          |                |                   |            |         |           | 1      |         |        | 1               | 1        |          | 1     | 1               |                 |                |                | 1              | 1              |                | 1    | 1              | 1              |                |                |                | 1   | 1               |                |            | 1        | 1              | 1              | 1              | 1        | 1                      |                |   |
| CTG-> <u>G</u> GC | 14Arg->Gly        | 125          |                |                   |            |         |           |        |         |        |                 |          |          |       |                 |                 |                |                |                |                |                |      |                |                |                |                |                |     |                 |                |            | 1        |                |                |                |          |                        |                |   |
| CTG-> <u>G</u> GA | 14Arg->Gly        | 125          |                |                   |            |         |           |        |         |        |                 |          |          |       |                 |                 |                |                |                |                |                |      |                |                |                | 1              |                |     |                 |                |            |          |                |                |                |          |                        |                |   |
| ICL1              | CTG-> <u>C</u> AT | 62Leu->His + | 99             | 0                 | 0          | 0       | 0         | 0      | 0       | 0      | 0               |          | 0        |       | 1               |                 |                | 1              |                |                |                | 1    |                |                |                |                |                |     |                 | 0              | 0          |          |                |                |                |          |                        |                |   |
|                   | CTG-> <u>G</u> CA | 62Leu->Ala + | 96             |                   |            |         |           |        |         |        |                 |          |          |       |                 |                 |                |                |                |                |                |      |                |                |                |                |                |     |                 |                |            |          |                |                |                |          |                        |                |   |
|                   | CTG-> <u>C</u> CG | 62Leu->Pro + | 98             |                   |            |         |           |        |         |        |                 |          |          |       |                 |                 |                | 1              |                |                |                |      |                |                |                |                |                |     |                 |                |            |          |                |                |                |          |                        |                |   |
|                   | CTG-> <u>C</u> CA | 62Leu->Pro + | 98             |                   |            |         |           |        |         |        |                 | 1        |          |       |                 |                 |                |                | 1              |                | 1              |      |                |                |                | 1              |                | 1   |                 |                |            |          |                | 1              | 1 <sub>i</sub> |          |                        |                |   |
|                   | CTG-> <u>C</u> CC | 62Leu->Pro + | 98             |                   |            |         |           |        |         |        |                 |          |          |       |                 |                 | 1              |                |                |                |                |      |                |                |                | 1              |                |     |                 |                |            |          |                |                |                |          |                        |                |   |
|                   | CTG-> <u>C</u> CT | 62Leu->Pro + | 98             |                   |            |         |           |        |         |        |                 |          |          |       |                 |                 |                |                |                |                |                | 1    |                |                |                |                |                |     |                 |                |            |          | 1              |                |                |          |                        |                |   |
|                   | CTG-> <u>C</u> GA | 62Leu->Arg + | 102            |                   |            |         |           |        |         |        |                 |          |          |       |                 |                 |                |                |                |                |                |      |                |                |                |                | 1 <sub>i</sub> |     |                 |                |            |          |                |                |                |          |                        |                |   |
|                   | CTG-> <u>C</u> GG | 62Leu->Arg + | 102            |                   |            |         |           |        |         |        |                 |          |          |       |                 |                 |                |                |                |                |                |      |                |                |                |                |                |     |                 |                |            |          | 1 <sub>i</sub> | 1 <sub>i</sub> |                |          |                        |                |   |

|                   |                   |                         |             |    |   |   |   |   |   |   |   |   |   |   |   |   |   |   |   |   |  |  |  |                |   |   |   |   |   |                |   |   |   |   |   |   |   |   |   |   |   |   |   |   |
|-------------------|-------------------|-------------------------|-------------|----|---|---|---|---|---|---|---|---|---|---|---|---|---|---|---|---|--|--|--|----------------|---|---|---|---|---|----------------|---|---|---|---|---|---|---|---|---|---|---|---|---|---|
|                   | CTG-> <u>C</u> AG | 62Leu->Gln +            | 113         | 1  |   |   |   |   |   |   |   |   |   |   |   |   |   | 1 |   |   |  |  |  |                |   |   |   |   |   |                |   |   |   |   |   |   |   |   |   |   |   |   |   |   |
|                   | CTG-> <u>T</u> CA | 62Leu->Ser +            | 145         | 1  |   |   |   |   |   |   |   |   |   |   |   |   |   |   |   |   |  |  |  |                |   |   |   |   |   |                |   |   |   |   |   |   |   |   |   |   |   |   |   |   |
| ICL3              | GGA-> <u>G</u> CG | 241Gly->Ala             | 60          | 0  | 0 | 0 | 0 | 0 | 0 | 0 | 0 | 0 | 0 | 0 | 1 | 0 |   |   |   |   |  |  |  |                |   | 0 | 0 | 0 | 0 | 0              | 0 | 0 | 0 | 0 | 0 | 1 |   |   |   |   |   |   |   |   |
|                   | GGA-> <u>G</u> CA | 241Gly->Ala             | 60          |    |   |   |   |   |   |   |   |   |   | 1 | 1 |   |   |   |   |   |  |  |  |                |   |   |   |   |   |                |   |   |   |   |   |   |   |   |   |   |   |   |   |   |
|                   | GGA-> <u>G</u> AA | 241Gly->Glu             | 98          |    |   |   |   |   |   |   |   |   |   |   |   |   |   |   |   |   |  |  |  | 1              | 1 |   |   |   |   |                |   |   |   |   |   |   |   |   |   |   |   |   |   |   |
|                   | GGA-> <u>A</u> GA | 241Gly->Arg             | 125         |    |   |   |   |   |   |   |   |   |   | 1 | 1 |   |   |   |   |   |  |  |  |                | 1 |   |   |   |   |                |   |   |   |   |   |   |   |   |   |   |   |   |   |   |
|                   | GGA-> <u>A</u> GG | 241Gly->Arg             | 125         |    |   |   |   |   |   |   |   |   |   | 1 | 1 | 1 |   |   |   |   |  |  |  |                |   |   |   |   |   |                |   |   |   |   |   |   |   |   |   |   |   |   |   |   |
| C-terminal        | CAG-> <u>C</u> GT | 360Gln->Arg             | 43          | 0  | 0 | 0 | 0 | 0 | 0 | 0 | 0 | 0 | 0 | 1 | 0 |   |   |   |   |   |  |  |  |                | 0 |   |   |   |   |                |   |   |   |   | 0 | 0 |   |   |   |   |   |   |   |   |
|                   | CAG-> <u>C</u> GG | 360Gln->Arg             | 43          |    |   |   |   |   |   |   |   |   |   | 1 | 1 | 1 | 1 | 1 | 1 |   |  |  |  |                |   |   |   |   | 1 | 1 <sub>d</sub> | 1 | 1 | 1 |   |   |   |   |   |   |   |   |   |   |   |
|                   | CAG-> <u>A</u> AG | 360Gln->Lys             | 53          |    |   |   |   |   |   |   |   |   |   | 1 | 1 |   |   |   |   |   |  |  |  |                |   |   |   |   |   |                |   |   |   |   |   |   |   |   |   |   |   |   |   |   |
|                   | CAG-> <u>T</u> CG | 360Gln->Ser             | 68          |    |   |   |   |   |   |   |   |   |   |   |   |   |   |   |   |   |  |  |  | 1 <sub>m</sub> |   |   |   |   |   |                |   |   |   |   |   |   |   |   |   |   |   |   |   |   |
|                   | CAG-> <u>C</u> CG | 360Gln->Pro             | 76          |    |   |   |   |   |   |   |   |   |   |   |   |   |   |   |   |   |  |  |  |                |   |   |   |   |   |                |   |   |   | 1 |   |   |   |   |   |   |   |   |   |   |
|                   | CAG-> <u>G</u> GG | 360Gln->Gly             | 87          |    |   |   |   |   |   |   |   |   |   |   |   |   |   |   |   |   |  |  |  | 1              | 1 | 1 | 1 | 1 |   |                |   |   |   |   |   |   |   | 1 |   |   |   |   |   |   |
|                   | GAA-> <u>C</u> AA | <b>404Glu-&gt;Gln +</b> | 29          | 0  | 0 | 0 | 0 | 0 | 0 | 0 | 0 | 0 | 0 | 0 | 1 |   |   |   |   |   |  |  |  |                | 0 | 1 |   |   |   |                |   |   |   |   |   | 0 | 0 | 0 | 0 | 0 | 0 | 0 | 0 | 0 |
|                   | GAA-> <u>C</u> AG | <b>404Glu-&gt;Gln +</b> | 29          |    |   |   |   |   |   |   |   |   |   |   |   |   |   |   |   |   |  |  |  | 1              |   |   |   |   |   |                |   |   |   |   | 1 |   |   |   |   |   |   |   |   |   |
|                   | GAA-> <u>A</u> GA | <b>404Glu-&gt;Arg +</b> | 54          |    |   |   |   |   |   |   |   |   |   |   |   |   |   |   |   |   |  |  |  | 1              |   |   |   |   |   |                |   |   |   |   |   |   |   |   |   |   |   |   |   |   |
|                   | GAA-> <u>A</u> AA | <b>404Glu-&gt;Lys +</b> | 56          |    |   |   |   |   |   |   |   |   |   |   |   |   |   |   |   |   |  |  |  | 1              |   |   |   |   |   |                |   |   |   |   |   |   |   |   |   |   |   |   |   |   |
|                   | GAA-> <u>A</u> CG | <b>404Glu-&gt;Thr +</b> | 65          |    |   |   |   |   |   |   |   |   |   |   |   |   |   |   |   |   |  |  |  | 1              |   |   |   |   |   |                |   |   |   |   |   |   |   |   |   |   |   |   |   |   |
|                   | GAA-> <u>G</u> GA | <b>404Glu-&gt;Gly +</b> | 98          |    |   |   |   |   |   |   |   |   |   |   |   |   |   |   |   |   |  |  |  | 1              |   |   |   |   |   |                |   |   |   |   |   |   |   |   |   |   |   |   |   |   |
|                   | GAA-> <u>G</u> CG | <b>404Glu-&gt;Ala +</b> | 107         |    |   |   |   |   |   |   |   |   |   | 1 | 1 |   |   |   |   |   |  |  |  |                |   |   |   |   |   |                |   |   |   |   |   |   |   |   |   |   |   |   |   |   |
|                   | GAA-> <u>G</u> CA | <b>404Glu-&gt;Ala +</b> | 107         |    |   |   |   |   |   |   |   |   |   | 1 |   |   |   |   |   |   |  |  |  | 1              | 1 | 1 | 1 |   |   |                |   |   |   |   |   |   |   |   |   |   |   |   |   |   |
|                   | GAA-> <u>A</u> TA | <b>404Glu-&gt;Ile +</b> | 134         |    |   |   |   |   |   |   |   |   |   | 1 |   |   |   |   |   |   |  |  |  |                |   |   |   |   |   |                |   |   |   |   |   |   |   |   |   |   |   |   |   |   |
|                   |                   | TTG-> <u>A</u> CA       | 410Leu->Thr | 92 | 0 | 0 | 0 | 0 | 0 | 0 | 0 | 0 | 0 | 0 | 0 | 0 | 0 | 0 | 0 | 1 |  |  |  |                |   |   |   |   |   | 0              |   |   |   |   |   |   |   |   |   | 0 | 0 |   |   |   |
|                   |                   | TTG-> <u>G</u> CA       | 410Leu->Ala | 96 |   |   |   |   |   |   |   |   |   |   |   |   |   |   |   |   |  |  |  |                | 1 |   |   |   |   |                |   |   |   |   |   |   |   |   |   |   |   |   |   |   |
|                   |                   | TTG-> <u>C</u> CA       | 410Leu->Pro | 98 |   |   |   |   |   |   |   |   |   |   |   |   |   |   |   |   |  |  |  |                | 1 |   |   |   |   |                |   |   |   |   | 1 |   |   |   |   |   |   |   |   |   |
| TTG-> <u>G</u> AA |                   | 410Leu->Glu             | 138         |    |   |   |   |   |   |   |   |   |   |   |   |   |   |   |   |   |  |  |  | 1              |   |   |   |   |   |                |   |   |   |   |   |   |   |   |   |   |   |   |   |   |
| TTG-> <u>T</u> CG |                   | 410Leu->Ser             | 145         |    |   |   |   |   |   |   |   |   |   | 1 | 1 |   |   |   |   |   |  |  |  |                | 1 | 1 |   |   |   |                |   |   |   |   |   |   |   |   |   |   |   |   |   |   |
| TTG-> <u>T</u> CC |                   | 410Leu->Ser             | 145         |    |   |   |   |   |   |   |   |   |   | 1 |   |   |   |   |   |   |  |  |  |                |   |   |   |   |   |                |   |   |   |   |   |   |   |   |   |   |   |   |   |   |
| TTG-> <u>T</u> CA |                   | 410Leu->Ser             | 145         |    |   |   |   |   |   |   |   |   |   |   |   |   |   |   |   |   |  |  |  | 1              |   |   |   |   |   |                |   |   |   | 1 | 1 | 1 | 1 | 1 | 1 | 1 |   |   |   |   |
| TTG-> <u>T</u> CT |                   | 410Leu->Ser             | 145         |    |   |   |   |   |   |   |   |   |   |   |   |   |   |   |   |   |  |  |  | 1              |   |   |   |   |   |                |   |   |   |   |   |   |   |   |   |   |   |   |   |   |

Sites identified in the Bayes Empirical Bayes (BEB) analysis with a probability higher than 65% of being under  $\omega > 1$ , which indicates positive selection. + Positively selected sites ( $p >95\%$ ); bold text indicates positively selected sites ( $p >99\%$ ). AVPR1b regions: N-terminal= Amino-terminus; ICL 1= Intracellular 1; ICL 3 = Intracellular 3; and C-terminal = Carboxyl-terminus. Zero (0) indicates the amino acid present in the *Homo sapiens* reference sequence, whereas 1 indicates a variant amino acid.

The nature of the modification does not represent an ancestry and descendant relationship. Grantham scores are predicted as conservative (0–50), moderately conservative (51–100), moderately radical (101–150), or radical (>151). Subscripted letters indicate the predicted presence of specific Eukaryotic Linear Motifs (as depicted using the code shown in Table S11). Scientific names of the species can be found in Table S1.
